# Supplementary material for: Time-course of host cell transcription during the HTLV-1 transcriptional burst
Source: PubMed Central journal article supplement (PMC9135347; doi:10.1371/journal.ppat.1010387), 2022-05-16

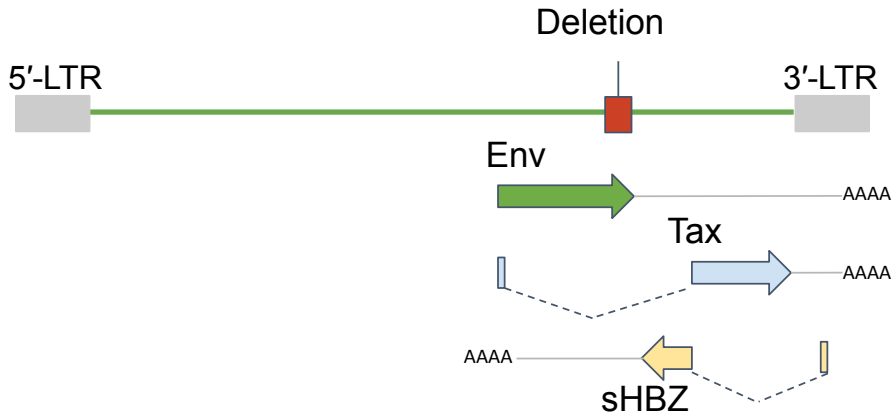

Supplement: ppat.1010387.s001.pdf [file ppat.1010387.s001.pdf]
